# Supplementary material for: Sequential macrophage transition facilitates endogenous bone regeneration induced by Zn-doped porous microcrystalline bioactive glass
Source: Royal Society of Chemistry journal article supplement (doi:10.1039/d0tb02884c), 2021-01-01
Supplement: d0tb02884c2.pdf [file d0tb02884c2.pdf]

Fig. S2

A

| Primer Sequences |                         |                           |
|------------------|-------------------------|---------------------------|
| Gene             | Forward Sequences       | Reverse Sequences         |
| IL-1 $\beta$     | ATGGCTTATTACAGTGGCA     | GTAGTGGTGGTCGGAGATT       |
| Arg-1            | CTTGGCAAAAGACTTATCCTTAG | ATGACATGGACACATAGTACCTTTC |
| IL-10            | TCAAGGCGCATGTGAACTCC    | GATGTCAAACCTCACTCATGGCT   |
| TNF- $\alpha$    | CCCAGGGACCTCTCTAATC     | ATGGGCTACAGGCTTGCTACT     |
| OCN              | GGCGCTACCTGTATCAATGG    | GTGGTCAGCCAACTCGTCA       |
| OPN              | GGAGTTGAATGGTGCATACAAGG | CCACGGCTGTCCCAATCAG       |
| GAPDH            | GAAGGTGAAGGTCGGAGTC     | GAAGATGGTGATGGGATTTTC     |
